# Supplementary material for: The Cloud Resolving Model Radar Simulator (CR-SIM) Version 3.2:Description and Applications of a Virtual Observatory
Source: Copernicus journal article supplement (doi:10.5194/gmd-2019-207), 2019-09-02
Supplement: Supplementary file [file gmd-2019-207-AC2-supplement.pdf]

## Response to comments from Executive Editor

**This is an executive editor comment highlighting the ways in which this manuscript is not currently compliant with GMD policy on code and data availability. In this case, there are a number of technical issues which needs to be remedied in the revised submission:**

**1. Model code on institutional websites. This is insufficiently persistent as institutional websites change. Please upload the exact version of the source code used to a persistent public archive such as Zenodo or the Stonybrook academic commons, and cite it appropriately. Since the code is GPL, there should be nothing preventing this from being done.**

We have submitted the source code to the Stony Brook Academic Commons. However, we have not received the right link of the code from the university yet. We will update the link as soon as we receive it. Because the source code is the latest version 3.3, we changed the title to “The Cloud Resolving Model Radar Simulator (CR-SIM) Version 3.3: Description and Applications of a Virtual Observatory.”

**2. Code available on request. I recognise that this is quite a small piece of code, but it breaks the provenance chain for the paper. Please archive this code somewhere suitable (if it is really rather small then you might just include it in the supplementary material of the paper).**

We posted the code that converts model grid coordinate to radar polar coordinate at the CR-SIM website on August 30, 2019. In addition, the code has been submitted to the Stony Brook Academic Commons together with the CR-SIM package. We have updated the code availability.

**3. The LASSO data used is not identified with sufficient precision that someone could reuse your work. The ARM archive provides a mechanism to generate a DOI for the exact data you want to cite. Please use this facility and cite the data following the instructions at <https://www.arm.gov/working-with-arm/acknowledging-arm/doi-guidance-for-datastreams>.**

We have cited:

Atmospheric Radiation Measurement (ARM) Research Facility. September 2017. LASSO Data Bundles. , 36° 36' 18.0" N, 97° 29' 6.0" W: Southern Great Plains Central Facility (C1). Compiled by WI Gustafson, AM Vogelmann, X Cheng, S Endo, KL Johnson, B Krishna, Z Li, T Toto, and H Xiao. ARM Data Archive: Oak Ridge, Tennessee, USA. Data set accessed at <http://dx.doi.org/10.5439/1342961>.

**4. The archive of configuration files is excellent, and the Stonybrook academic commons complies with GMD policy. However, citing this by URL is not good practice. If you look at the entry in the repository itself, it shows you how to cite it. Please do so: <https://commons.library.stonybrook.edu/somasdata/3/> Further details on code and data availability requirements are in the GMD model code and data policy: [https://www.geoscientific-model-development.net/about/code\\_and\\_data\\_policy.html](https://www.geoscientific-model-development.net/about/code_and_data_policy.html). The**

**reasons for the policy and more detail are provided in this editorial:  
<https://doi.org/10.5194/gmd-12-2215-2019>.**

Thank you pointing this out. The data submission was posted on Oct. 4, 2019. We have included the right URL and citation in the revised manuscript.
